# Supplementary material
Source: Springer Nature journal article supplement (https://www.springermedizin.de/resource/supplementary/12885_2014_4636_MOESM9_ESM.pdf/9466914)

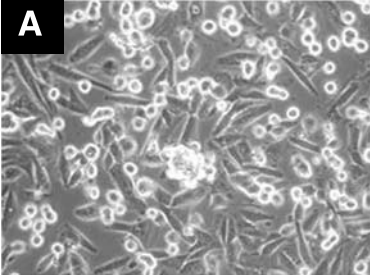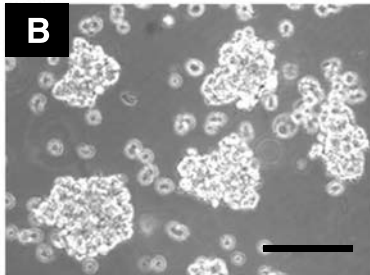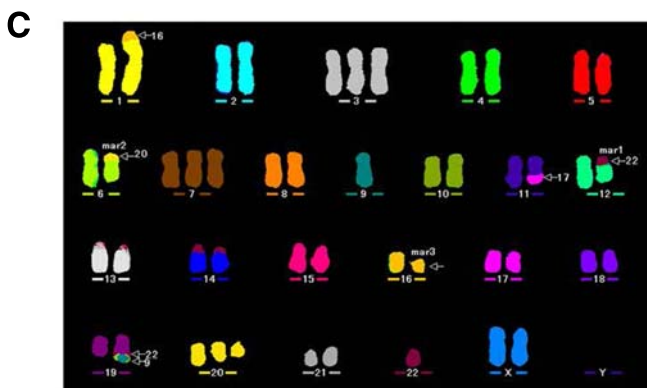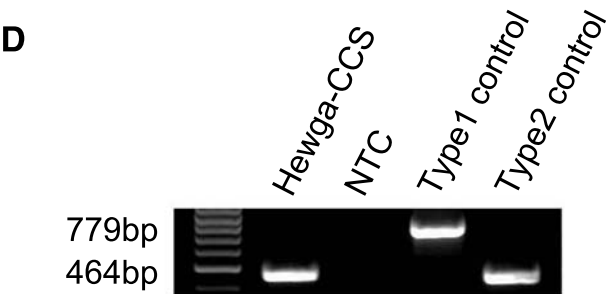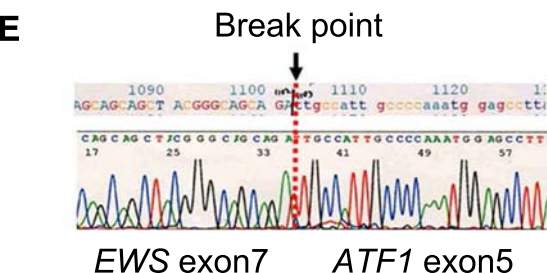

Supplement: MOESM9 [file 9466914]
